# Supplementary material for: Targeted neurotransmitter metabolomics profiling of oleanolic acid in the treatment of spontaneously hypertensive rats
Source: Royal Society of Chemistry journal article supplement (doi:10.1039/c9ra02377a), 2019-01-01
Supplement: c9ra02377a1.pdf [file c9ra02377a1.pdf]

Table S-1 The sequences of primers

| Primer name | Primer sequence                 |
|-------------|---------------------------------|
| DDC         | 5'-TTCTTCGTGGTTGTCACCTAG-3'     |
|             | 5'-AGATACCGAACTCAGGACAGA-3'     |
| Comt        | 5'-GCCTACAGGACAAAGTCACCA-3'     |
|             | 5'-AAGTGTGTCTGGAAGGTAGCG-3'     |
| MAO         | 5'-AACCCGAGTCCAAGGATGTTTC-3'    |
|             | 5'-GCAGAGAAGAGCCACAGAAGT-3'     |
| Gad67       | 5'-GCTTGGCTTTGGAAGTACCAATGTG-3' |
|             | 5'-CAGTCGTGCCTGCGGTTGC-3'       |
| Dbh         | 5'-ACCTCTGCCGTCCTCC-3'          |
|             | 5'-CTGCCTCCGTGGTGATGACAAC-3'    |
| TH          | 5'-AGCGCCATTCTCTGTGAAG-3'       |
|             | 5'-CTGTGGGTGGTACCCTATGC-3'      |
| ACHE        | 5'-GCTCGGGTCTATGCCTACATCTTTG-3' |
|             | 5'-TTCTCTCCTCCACGGTGTAGTTCAG-3' |

Table S-2 Summary of the linear range and regression equation, LOD and LOQ results of the LC-QE-MS method for the analyzed quality control samples

| Neurotransmitters          | Linear range<br>ng·mL <sup>-1</sup> | Regression equation            | r      | LOD<br>ng·mL <sup>-1</sup> | LOQ<br>ng·mL <sup>-1</sup> |
|----------------------------|-------------------------------------|--------------------------------|--------|----------------------------|----------------------------|
| L-Histidine                | 2.5-1000                            | Y = -0.000123575+0.000651925*X | 0.9992 | 0.10                       | 0.30                       |
| Histamine                  | 2.5-1000                            | Y = -0.0027685+0.00105485*X    | 0.9997 | 0.20                       | 0.50                       |
| L-Ornithine                | 2.5-1000                            | Y = -0.000320582+0.000178781*X | 0.9980 | 0.30                       | 1.00                       |
| L-Tyrosine                 | 100-5000                            | Y=0.00612046+0.000645315*X     | 0.9975 | 0.30                       | 1.00                       |
| Homovanillic acid          | 100-5000                            | Y = 0.00199248+7.16219e-005*X  | 0.9945 | 1.00                       | 5.00                       |
| L-Citrulline               | 2.5-1000                            | Y = 0.00395988+0.000867413*X   | 0.9947 | 1.50                       | 5.00                       |
| L-Glutamine                | 100-5000                            | Y = 0.0534283+0.00109105*X     | 0.9900 | 1.50                       | 5.00                       |
| L-Glutamate                | 50-20000                            | Y = 0.0718867+0.000518421*X    | 0.9979 | 0.20                       | 1.00                       |
| Γ-Aminobutyric acid        | 50-20000                            | Y= 0.0348965+0.000505073*X     | 0.9996 | 0.10                       | 1.00                       |
| L-Proline                  | 2.5-1000                            | Y = 0.00503059+0.00175473*X    | 0.9978 | 0.30                       | 1.00                       |
| Epinephrine                | 100-5000                            | Y = 0.110632+0.00128883*X      | 0.9984 | 0.20                       | 0.50                       |
| Choline                    | 100-5000                            | Y = 0.149382+0.00081938*X      | 0.9951 | 0.20                       | 0.50                       |
| Dopamine                   | 100-5000                            | Y = 0.00750808+6.2054e-005*X   | 0.9952 | 0.30                       | 2.00                       |
| L-Phenylalanine            | 100-5000                            | Y = 0.105773+0.00134366*X      | 0.9928 | 0.30                       | 0.50                       |
| Acetylcholine              | 2.5-1000                            | Y = 0.00890604+0.00483898*X    | 0.9995 | 0.30                       | 2.00                       |
| 5-hydroxyindoleacetic acid | 2.5-1000                            | Y = -0.000589054+0.000207323*X | 0.9925 | 1.00                       | 10.00                      |
| L-Arginine                 | 2.5-1000                            | Y = 0.00070588+0.000656132*X   | 0.9911 | 0.20                       | 0.50                       |
| Levodopa                   | 2.5-1000                            | Y = 0.000462291+0.000271332*X  | 0.9987 | 0.20                       | 2.00                       |
| L-Threonine                | 2.5-1000                            | Y = 0.00989336+0.0561152*X     | 0.9943 | 0.30                       | 1.00                       |

|                |          |                                     |        |      |      |
|----------------|----------|-------------------------------------|--------|------|------|
| Hydroxyproline | 2.5-1000 | $Y = 0.00934336 + 0.00114152 * X$   | 0.9957 | 0.30 | 1.00 |
| L-Methionine   | 2.5-1000 | $Y = 0.000868367 + 0.000604462 * X$ | 0.9977 | 0.60 | 2.00 |
| L-Serine       | 2.5-1000 | $Y = 0.00239734 + 0.000476314 * X$  | 0.9986 | 0.20 | 0.50 |
| L-Leucine      | 100-5000 | $Y = 0.338652 + 0.00317502 * X$     | 0.9902 | 0.30 | 1.00 |

Table S-3 Summary of the accuracy and precision results of the LC-QE-MS method for the analyzed quality control samples

| Neurotransmitters          | Intraday precision |            | Inter-day precision |             |
|----------------------------|--------------------|------------|---------------------|-------------|
|                            | accuracy           | precision  | accuracy            | precision   |
|                            | (%)                | (RSD,%)    | (%)                 | (RSD,%)     |
| L-Histidine                | 85.74-112.7        | 3.55-12.75 | 78.27-99.59         | 11.07-15.77 |
| Histamine                  | 82.61-106.83       | 0.8-13.04  | 80.21-99.93         | 0.76-14.66  |
| L-Ornithine                | 77.11-87.92        | 1.16-9.60  | 73.54-87.92         | 1.54-12.29  |
| L-Tyrosine                 | 85.46-102.6        | 0.25-3.28  | 82.69-100.2         | 2.16-4.39   |
| Homovanillic acid          | 83.74-94.94        | 0.63-6.72  | 78.9-92.55          | 0.6-12.69   |
| L-Citrulline               | 74.64-100.39       | 1.66-12.57 | 77.67-107.64        | 3.13-14.08  |
| L-Glutamine                | 81.17-105.74       | 3.35-11.04 | 75.39-98.82         | 8.65-12.01  |
| L-Glutamate                | 89.48-95.82        | 1.51-6.80  | 86.03-90.87         | 3.48-7.61   |
| Γ-Aminobutyric acid        | 93.04-98.82        | 1.29-1.42  | 88.72-98.33         | 2.48-8.86   |
| L-Proline                  | 74.45-89.91        | 1.35-4.19  | 71.05-87.77         | 2.81-14.70  |
| Epinephrine                | 83.17-91.41        | 0.89-7.19  | 78.22-81.14         | 8.03-14.92  |
| Choline                    | 83.45-128.25       | 1.22-6.11  | 76.12-116.94        | 3.5-13.84   |
| Dopamine                   | 84.69-103.1        | 1.82-11.13 | 81.68-103.1         | 1.73-11.08  |
| L-Phenylalanine            | 86.04-89.48        | 2.9-11.42  | 81.84-86.04         | 4.6-13.11   |
| Acetylcholine              | 81.60-91.34        | 1.87-4.89  | 77.83-81.03         | 6.91-17.84  |
| 5-hydroxyindoleacetic acid | 80.55-102.51       | 2.81-6.76  | 70.12-95.54         | 4.27-17.4   |
| L-Arginine                 | 89.02-112.61       | 2.32-10.65 | 81.77-96.85         | 14.68-18.4  |
| Levodopa                   | 83.36-88.23        | 1.52-8.9   | 80.88-82.16         | 2.42-11.91  |
| L-Threonine                | 77.98-112.82       | 1.82-9.14  | 71.11-109.89        | 3.55-16.04  |
| Hydroxyproline             | 80.95-113.84       | 1.17-10.51 | 80.28-110.99        | 2.97-8.36   |
| L-Methionine               | 75.15-83.00        | 2.74-21.91 | 70.14-80.03         | 4.49-23.83  |
| L-Serine                   | 85.03-126.13       | 0.24-6.03  | 79.54-122.09        | 3.80-13.15  |
| L-Leucine                  | 83.04-125.67       | 0.48-11.72 | 83.04-122.39        | 2.88-11.18  |

Table S-4 Summary of the accuracy and stability results of the LC-QE-MS method for the analyzed quality control samples.

| Neurotransmitters | intraday stability |            | inter-day stability |             |
|-------------------|--------------------|------------|---------------------|-------------|
|                   | accuracy           | stability  | accuracy            | stability   |
|                   | (%)                | (RSD,%)    | (%)                 | (RSD,%)     |
| L-Histidine       | 83.72-106.08       | 2.4-9.93   | 75.57-91.95         | 11.99-19.93 |
| Histamine         | 83.17-97.81        | 0.51-3.01  | 80.51-99.78         | 1.56-8.58   |
| L-Ornithine       | 77.18-92.63        | 1.79-4.70  | 73.27-85.89         | 6.5-8.93    |
| L-Tyrosine        | 86.86-103.01       | 1.12-2.27  | 83.86-100.55        | 2.46-4.13   |
| Homovanillic acid | 82.81-95.68        | 0.57-5.05  | 83.44-93.03         | 3.36-12.37  |
| L-Citrulline      | 74.67-111.27       | 1.63-18.51 | 71.07-108.45        | 2.94-19.78  |

|                            |              |            |              |             |
|----------------------------|--------------|------------|--------------|-------------|
| L-Glutamine                | 79.52-102.91 | 3.32-4.78  | 74.04-97.30  | 7.07-9.77   |
| L-Glutamate                | 89.12-92.32  | 1.39-3.58  | 85.94-87.61  | 4.27-6.26   |
| Γ-Aminobutyric acid        | 93.51-97.77  | 0.93-3.33  | 89.26-97.80  | 2.44-5.32   |
| L-Proline                  | 71.81-96.14  | 1.61-12.59 | 70.58-90.25  | 3.47-19.24  |
| Epinephrine                | 83.6-88.05   | 1.18-4.19  | 77.58-84.70  | 4.82-14.96  |
| Choline                    | 79.83-122.69 | 1.01-4.66  | 73.52-111.55 | 4.00-12.5   |
| Dopamine                   | 87.72-102.94 | 0.8-2.33   | 80.76-100.03 | 313-13.02   |
| L-Phenylalanine            | 87.31-93.22  | 1.76-4.41  | 81.78-84.23  | 4.15-12.14  |
| Acetylcholine              | 80.72-94.52  | 0.94-10.10 | 75.93-84.59  | 4.41-20.45  |
| 5-hydroxyindoleacetic acid | 85.93-101.47 | 1.80-7.14  | 75.25-94.87  | 3.70-16.91  |
| L-Arginine                 | 88.49-114.01 | 1.15-7.81  | 78.25-100.15 | 15.12-20.26 |
| Levodopa                   | 82.37-87.91  | 0.85-8.37  | 80.36-81.67  | 2.75-14.68  |
| L-Threonine                | 76.87-113.44 | 0.75-20.27 | 71.11-110.58 | 2.82-26.38  |
| Hydroxyproline             | 85.93-112.93 | 0.69-14.29 | 80.58-110.03 | 3.05-17.17  |
| L-Methionine               | 71.28-81.50  | 1.16-21.9  | 70.1-78.61   | 3.98-18.3   |
| L-Serine                   | 85.11-128.63 | 1.06-14.01 | 79.55-126.31 | 2.13-19.24  |
| L-Leucine                  | 82.25-126.67 | 0.73-5.64  | 80.14-123.90 | 2.72-11.58  |

Table S-5 MS parameters of 23 measured neurotransmitters

| NO | Name                       | Precursor ion (m/z) | Product ion (m/z)                                 |
|----|----------------------------|---------------------|---------------------------------------------------|
| 1  | L-Histidine                | 156.07655           | 110.07159,95.06085,83.06102                       |
| 2  | Histamine                  | 112.01810           | 88.08488,57.04567                                 |
| 3  | L-Ornithine                | 133.09712           | 90.05555,87.05599                                 |
| 4  | L-Tyrosine                 | 182.08087           | 165.05457,137.07565,147.04398,136.07565,123.04420 |
| 5  | Homovanillic acid          | 165.05444           | 137.05969,123.04418,147.04420,119.04940           |
| 6  | L-Citrulline               | 176.10266           | 130.03226,84.04508                                |
| 7  | L-Glutamine                | 147.07613           | 130.04997,119.04942,102.05540                     |
| 8  | L-Glutamate                | 148.06013           | 130.04997,102.05540,84.04503                      |
| 9  | Γ-Aminobutyric acid        | 104.10741           | 87.04469,60.08165,69.03430,86.06069               |
| 10 | L-Proline                  | 116.07075           | 70.06584                                          |
| 11 | Epinephrine                | 166.08597           | 149.02673,74.02440                                |
| 12 | Choline                    | 104.10714           | 87.04469,69.04430,60.08165                        |
| 13 | Dopamine                   | 136.07547           | 126.95537,119.03554                               |
| 14 | L-Phenylalanine            | 166.08626           | 120.08101,103.05469                               |
| 15 | Acetylcholine              | 146.11737           | 87.04470,84.04506,130.05000                       |
| 16 | 5-hydroxyindoleacetic acid | 192.06516           | 146.06006,107.96027                               |
| 17 | L-Arginine                 | 175.11870           | 116.07085,130.07953,70.06589                      |
| 18 | Levodopa                   | 198.07603           | 152.07086,135.04402                               |
| 19 | L-Threonine                | 120.06567           | 102.05542,74.06078,56.05039                       |
| 20 | Hydroxyproline             | 132.10173           | 86.09708                                          |

|    |              |            |                                          |
|----|--------------|------------|------------------------------------------|
| 21 | L-Methionine | 150.05803  | 133.03185,104.05327,56.05039             |
| 22 | L-Serine     | 106.05018  | 79.05502,60.04528                        |
| 23 | L-Leucine    | 132..07657 | 112.84048,13.07657,87.10034,86.09708     |
| 24 | IS           | 290.10944  | 262.11490,.227.14618,119.11969,154.04160 |

Table S-6. The content for neurotransmitters of restored by OA in brain samples. (\*P < 0.05,\*\*P < 0.01 compared to the SHR group.(ug/g, n = 6)

|                     | Hippocampus      |                 |                  | Striatum         |                 |                  |
|---------------------|------------------|-----------------|------------------|------------------|-----------------|------------------|
|                     | Control group    | SHR group       | OA group         | Control group    | SHR group       | OA group         |
| L-Histidine         | 0.00104±0.00006  | 0.00129±0.00039 | 0.00117±0.00022  | 3.032±1.039*     | 4.197±0.739     | 3.082±0.837*     |
| Histamine           | 0.073±0.002      | 0.075±0.001     | 0.073±0.001      | 0.074±0.002      | 0.076±0.002     | 0.076±0.002      |
| L-Ornithine         | 0.519±0.091**    | 0.349±0.038     | 0.569±0.203**    | 0.603±0.117      | 0.923±0.386     | 0.604±0.182      |
| L-Tyrosine          | 32.257±1.9       | 34.162±5.737    | 41.163±3.773*    | 73.228±17.142**  | 34.436±1.686    | 53.761±9.358**   |
| Homovanillic acid   | 40.034±3.388**   | 56.702±3.709    | 53.134±5.222     | 29.524±1.35**    | 61.563±15.589   | 37.188±2.813**   |
| L-Citrulline        | 0.342±0.021*     | 0.215±0.06      | 0.315±0.072*     | 0.144±0.059**    | 0.577±0.285     | 0.295±0.073*     |
| L-Glutamine         | 29.584±5.12**    | 59.214±5.199    | 39.622±9.634**   | 42.193±4.391**   | 97.92±22.589    | 47.202±6.208**   |
| L-Glutamate         | 103.251±19.596** | 224.503±16.906  | 163.426±27.188*  | 148.568±27.805** | 325.401±115.914 | 155.541±25.056** |
| Γ-Aminobutyric acid | 174.697±25.467*  | 123.964±30.612  | 180.278±37.429** | 225.675±61.667** | 148.568±27.805  | 193.644±21.566** |
| L-Proline           | 6.334±0.473*     | 5.364±0.603     | 9.129±2.047**    | 5.937±0.77**     | 9.703±2.854     | 6.998±1.183*     |
| Epinephrine         | 45.219±5.711     | 47.302±2.949    | 42.914±4.781     | 43.097±8.11**    | 65.247±12.203   | 45.942±4.641**   |
| Choline             | 98.73±7.489**    | 132.65±14.465   | 126.135±14.729   | 128.202±25.356** | 196.835±22.373  | 141.335±27.999** |
| Dopamine            | 38.873±3.069**   | 56.777±4.1      | 54.197±6.997     | 29.746±1.338**   | 53.946±12.612   | 37.339±2.673**   |
| L-Phenylalanine     | 59.449±9.715**   | 39.309±4.406    | 55.27±7.867**    | 40.506±6.485     | 52.431±16.705   | 44.624±4.178     |

|                            |                |             |                |               |              |               |
|----------------------------|----------------|-------------|----------------|---------------|--------------|---------------|
| Acetylcholine              | 0.324±0.108**  | 1.081±0.155 | 0.556±0.108**  | 0.586±0.181** | 1.289±0.217  | 0.653±0.133** |
| 5-hydroxyindoleacetic acid | 0.906±0.081**  | 1.338±0.07  | 1.056±0.12**   | 0.581±0.175   | 0.781±0.153  | 0.738±0.071   |
| L-Arginine                 | 12.542±1.418** | 6.537±0.6   | 11.306±1.758** | 9.441±2.256   | 14.736±5.969 | 9.869±2.562*  |
| Levodopa                   | —              | —           | —              | 0.358±0.067** | 0.731±0.691  | 0.316±0.114** |

|                     | Hypothalamus    |                |                 | Temporal lobe   |                |                  |
|---------------------|-----------------|----------------|-----------------|-----------------|----------------|------------------|
|                     | Control group   | SHR group      | OA group        | Control group   | SHR group      | OA group         |
| L-Histidine         | 1.95±0.214*     | 2.795±0.833    | 2.09±0.211*     | 1.705±0.438*    | 3.129±0.961    | 2.234±0.228      |
| Histamine           | 0.126±0.013*    | 0.338±0.132    | 0.209±0.044*    | 0.073±0.001     | 0.074±0.004    | 0.073±0.001      |
| L-Ornithine         | 1.011±0.149*    | 0.795±0.123    | 1.014±0.198*    | 0.506±0.128*    | 0.376±0.055    | 0.49±0.254       |
| L-Tyrosine          | 67.524±14.765** | 49.946±4.227   | 79.237±7.11*    | 36.923±2.591**  | 31.28±3.084    | 44.392±8.563*    |
| Homovanillic acid   | 68.166±15.316*  | 111.557±7.791  | 67.025±6.101*   | 37.966±4.406    | 53.046±17.5    | 36.673±7.774     |
| L-Citrulline        | 0.387±0.069**   | 0.24±0.088     | 0.334±0.082*    | 0.407±0.053**   | 0.265±0.065    | 0.407±0.259      |
| L-Glutamine         | 68.454±5.016*   | 70.285±16.764  | 59.827±5.656    | 46.07±9.505**   | 80.111±31.23   | 51.328±5.454*    |
| L-Glutamate         | 95.931±17.677** | 135.869±20.179 | 102.396±4.792** | 193.027±58.285* | 299.114±98.617 | 192.198±47.583*  |
| Γ-Aminobutyric acid | 461.692±78.717* | 380.173±54.269 | 396.224±50.958  | 229.012±50.247* | 161.169±24.791 | 290.338±218.045* |
| L-Proline           | 26.311±26.328** | 12.436±1.213   | 17.199±2.038**  | 10.331±3.374*   | 7.64±1.157     | 8.035±2.429      |

|                            |                 |                |                 |                |                |                |
|----------------------------|-----------------|----------------|-----------------|----------------|----------------|----------------|
| Epinephrine                | 72.548±14.035** | 112.498±28.239 | 68.486±10.964** | 26.814±2.377** | 53.695±37.317  | 26.269±3.935*  |
| Choline                    | 227.179±19.731* | 249.843±40.423 | 240.322±22.486  | 98.979±14.946* | 130.152±48.219 | 98.168±21.321* |
| Dopamine                   | 67.261±6.512**  | 95.323±25.379  | 71.469±5.8*     | 42.173±4.999   | 38.283±4.772   | 49.224±7.728   |
| L-Phenylalanine            | 96.589±20.782*  | 59.848±10.641  | 70.596±15.071   | 47.578±2.924*  | 34.356±7.182   | 43.479±5.118   |
| Acetylcholine              | 0.298±0.127*    | 0.576±0.19     | 0.359±0.034*    | 0.449±0.096**  | 0.987±0.281    | 0.531±0.103**  |
| 5-hydroxyindoleacetic acid | 1.466±0.546*    | 2.255±0.755    | 2.102±0.22      | 0.926±0.124    | 0.889±0.095    | 1.322±0.186**  |
| L-Arginine                 | 14.351±3.175*   | 11.033±1.93    | 15.48±1.949**   | 9.344±3.827*   | 5.979±1.489    | 9.224±9.063    |
| Levodopa                   | —               | —              | —               | —              | —              | —              |

Frontal lobe

|                   | Control group | SHR group    | OA group      |
|-------------------|---------------|--------------|---------------|
| L-Histidine       | 2.063±0.406   | 2.586±0.422  | 2.342±0.633   |
| Histamine         | 0.0708±0.0004 | 0.0717±0.001 | 0.0706±0.0003 |
| L-Ornithine       | 0.622±0.069*  | 0.493±0.099  | 0.518±0.104   |
| L-Tyrosine        | 53.375±7.729  | 49.529±5.389 | 52.57±10.288  |
| Homovanillic acid | 43.923±3.095  | 50.551±4.322 | 45.36±8.699   |
| L-Citrulline      | 0.51±0.056    | 0.433±0.11   | 0.58±0.304    |

|                            |                 |                |                |
|----------------------------|-----------------|----------------|----------------|
| L-Glutamine                | 48.216±6.012**  | 60.765±4.791   | 54.08±8.201    |
| L-Glutamate                | 210.164±12.611  | 223.073±31.644 | 204.29±18.386  |
| Γ-Aminobutyric acid        | 304.143±33.53*  | 202.991±23.354 | 248.258±54.725 |
| L-Proline                  | 8.145±0.377     | 7.626±1.274    | 7.865±1.035    |
| Epinephrine                | 59.387±11.214   | 62.103±5.288   | 56.295±8.331   |
| Choline                    | 141.079±9.732** | 117.217±7.07   | 126.854±9.958  |
| Dopamine                   | 43.495±3.335*   | 49.265±4.433   | 44.318±9.089   |
| L-Phenylalanine            | 69.77±13.007*   | 55.332±3.499   | 66.41±25.956   |
| Acetylcholine              | 1±0.113         | 0.845±0.214    | 0.883±0.158    |
| 5-hydroxyindoleacetic acid | 1.33±0.09*      | 0.935±0.345    | 1.415±0.236**  |
| L-Arginine                 | 8.473±1.585     | 6.613±0.941    | 7.951±2.242    |
| Levodopa                   | —               | —              | —              |

---



**Figure legends**

Fig. S-1 Representative LC/MS total ion current (TIC) chromatograms. LC/MS TIC chromatograms of five brain regions from SHR group, OA group, and control group A hippocampus, B striatum, C hypothalamus, D temporal lobe, E frontal lobe

Fig.S-2 The network of the neurotransmitters and relative expression levels of metabolic-related enzymes show variation for SHRs with or without OA modulation.

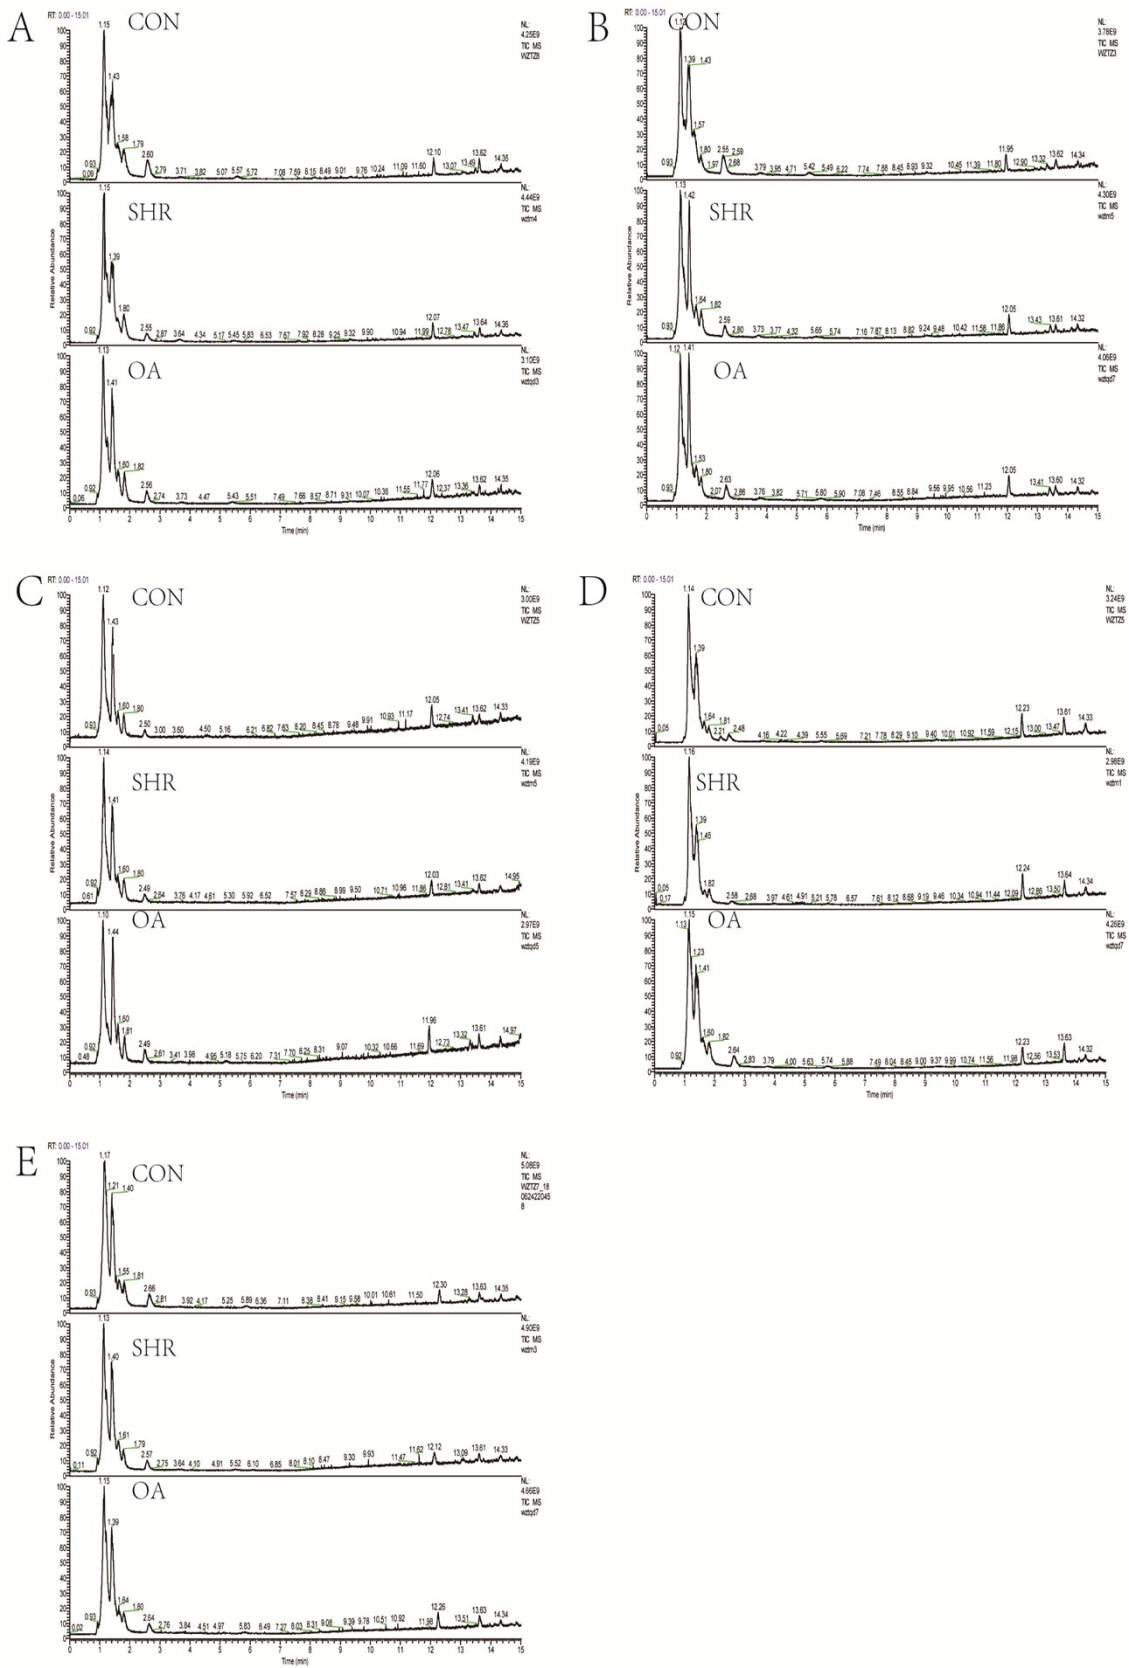

Fig.
